# Supplementary material for: Critical care nursing role in low and lower middle-income settings: a scoping review
Source: HighWire-hosted journal article supplement (doi:10.1136/bmjopen-2021-055585), 2022-01-01
Supplement: bmjopen-2021-055585supp001_data_supplement.pdf [file bmjopen-2021-055585supp001_data_supplement.pdf]

### Supplement 1: Search strings, additional limits, and database versions

#### Database versions accessed

- 1) Ovid MEDLINE(R) and Epub Ahead of Print, In-Process & Other Non-Indexed Citations, Daily and Versions(R)
- 2) Embase Classic+Embase
- 3) Ovid Emcare
- 4) Global Health
- 5) SCOPUS
- 6) Web of Science.

#### Applied search limits

Limits set in all database searches were publications in the last 10 years (2010-2020) and publications in English language.

Additional limits in SCOPUS were imposed to results from 3 subject areas:

- 1) medical
- 2) nursing
- 3) health professions.

Additional limits in Web of science were the categories:

- 1) nursing
- 2) critical care medicine
- 3) education
- 4) educational research
- 5) education scientific disciplines
- 6) health care sciences services
- 7) health policy services

#### Ovid search strings

((nurs\* or nurs\* assistant\* or Physician\* assistant\* or Multidisciplinary team\* or Care giver\* or Staff\* or technician\*) and (Intensive care or critical care or coronary care)).mp.

((((Role\* or practice\* or skill\* or task\* or Responsibilit\* or ratio\* or Scope of practice\* or (Nurs\* or profession\*)) adj2 patient\* relationship\*) or education\* or Prepar\* or train\* or development or (intensive care or critical care)) adj3 course\*).mp

(((((Low or Develop\*) adj3 (countr\* or nation\*)) or (limit\* or restrict or poor or low)) adj3 resource\*) or Third world or africa or maghreb or maghrib or sahara or algeria or egypt or morocco or tunisia or "africa south of the sahara" or sub-saharan or subsaharan or cameroon or central african republic or chad or comoros or congo or "democratic republic of the congo" or madagascar or "sao tome and principe" or british indian ocean territory or burundi or djibouti or eritrea or ethiopia or kenya or rwanda or somalia or south sudan or sudan or tanzania or uganda or angola or eswatini or lesotho or malawi or mozambique or zambia or

|  |  |                                                                                                                                                                                                                                                                                                                                                                                                                                                                                                                                                                                                                                                                                                          |
|--|--|----------------------------------------------------------------------------------------------------------------------------------------------------------------------------------------------------------------------------------------------------------------------------------------------------------------------------------------------------------------------------------------------------------------------------------------------------------------------------------------------------------------------------------------------------------------------------------------------------------------------------------------------------------------------------------------------------------|
|  |  | zimbabwe or benin or burkina faso or cabo verde or cote d'ivoire or gambia or ghana or guinea or guinea-bissau or liberia or mali or mauritania or niger or nigeria or senegal or sierra leone or togo or haiti or nicaragua or honduras or el salvador or Bolivia or kyrgyzstan or tajikistan or uzbekistan or kiribati or cambodia or laos or myanmar or philippines or timor-leste or vietnam or bangladesh or bhutan or india or nepal or pakistan or sri lanka or "democratic people's republic of korea" or Mongolia or west bank or gaza or afghanistan or syria or yemen or bosnia or moldova or Ukraine or pacific islands or papua new guinea or vanuatu or micronesia or solomon islands).mp. |
|--|--|----------------------------------------------------------------------------------------------------------------------------------------------------------------------------------------------------------------------------------------------------------------------------------------------------------------------------------------------------------------------------------------------------------------------------------------------------------------------------------------------------------------------------------------------------------------------------------------------------------------------------------------------------------------------------------------------------------|
