# Supplementary material for: Critical care nursing role in low and lower middle-income settings: a scoping review
Source: HighWire-hosted journal article supplement (doi:10.1136/bmjopen-2021-055585), 2022-01-01
Supplement: bmjopen-2021-055585supp002_data_supplement.pdf [file bmjopen-2021-055585supp002_data_supplement.pdf]

**Supplement 2: Bibliographies for tables 2-5***Bibliography of citations in Table 2*

1. Kassew T, Tilahun A. D, Liyew B. Nurses' Knowledge, Attitude, and Influencing Factors regarding Physical Restraint Use in the Intensive Care Unit: A Multicenter Cross-Sectional Study. *Crit Care Res Pract.* 2020.
2. Okech UK, Chokwe T, Mung'ayi V. The operational setup of intensive care units in a low income country in East Africa. *EAsT AFRICAN MEDICAL JOURNAL.* 2015;92(2).
3. Muniz SA, Lang RW, Falcon L, Garces-King J, Willard S, Peck GL. Preparing Global Trauma Nurses for Leadership Roles in Global Trauma Systems. *J Trauma Nurs.* 2017;24(5):306-11.
4. Gundo R. Contextual issues that influence preparedness of nurses for critical care nursing practice in Malawi. *Malawi Med J.* 2019;31(2):138-43.
5. Gundo R. Development, Implementation and Evaluation of an In-service Training Programme for Critical Care Nurses in Malawi. 2019.
6. Ufashingabire CM, Nsereko E, Njunwa KJ, Brysiewicz P. Knowledge and attitudes of nurses regarding pain in the intensive care unit patients in Rwanda. *Rwanda Journal.* 2016;3(1):21-6.
7. Cunningham C, Brysiewicz P, Sepeku A, White L, Murray B, Lobue N, et al. Developing an emergency nursing short course in Tanzania. *Afr J Emerg Med.* 2017;7(4):147-50.
8. Kizza IB, Muliira JK. Nurses' pain assessment practices with critically ill adult patients. *International Nursing Review.* 2015;62(4):573-82.
9. Carter C, Mukonka PS, Sitwala LJ, Howard-Hunt B, Notter J. The development of critical care nursing education in Zambia. *British journal of nursing (Mark Allen Publishing).* 2020;29(9):499-505.
10. Sathish Y, Lewis LE, Noronha JA, Nayak BS, Pai MS, Altimier L. Promoting developmental supportive care in preterm infants and families in a level III neonatal intensive care unit (NICU) setting in India. *Nurse Education in Practice.* 2019;40:8.
11. Dongara AR, Nimbalkar SM, Phatak AG, Patel DV, Nimbalkar AS. An Educational Intervention to Improve Nurses' Understanding of Pain in Children in Western India. *Pain Manag Nurs.* 2017;18(1):24-32.
12. Kalyan G, Bibi R, Kaur R, Bhatti R, Kumari R, Rana R, et al. Knowledge and practices of intensive care unit nurses related to prevention of ventilator associated pneumonia in selected intensive care units of a tertiary care centre, India. *Iranian Journal of Nursing and Midwifery Research.* 2020;25(5):369-75.
13. Pradhan N, Lama S, Mandal G, Shrestha E. Physical restraining: Nurses knowledge and practice in Tertiary Care Hospital of Eastern Nepal. *Nurs Open.* 2019;6(3):1029-37.
14. Bongar MVV, Pangan FC, Macindo JRB. Characteristics of a critical care clinical placement programme affecting critical care nursing competency of baccalaureate nursing students: A structural equation modelling. *Journal of Clinical Nursing.* 2019;28(9-10):1760-70.
15. Paguio JT, Banayat AC. Commentary on challenges to critical care nursing practice in the Philippines. *The World of Critical Care Nursing.* 2018;12(1).
16. Martinez RCKP, Rogado MIC, Serondo DJF, Soriano GP, Ilano KCS. Critical Care Nursing in the Philippines: Historical Past, Current Practices, and Future Directions. *Critical care nursing clinics of North America.* 2021;33(1):75-87.
17. Westcott M, Martiniuk ALC, Fowler RA, Adhikari NKJ, Dalipanda T. Critical care resources in the Solomon Islands: a cross-sectional survey. *BMC Int Health Hum Rights.* 2012;12:9.
18. Fadadu PP, Liu JC, Schiltz BM, Xoay TD, Phuc PH, Kumbamu A, et al. A Mixed-Methods Exploration of Pediatric Intensivists' Attitudes toward End-of-Life Care in Vietnam. *J Palliat Med.* 2019;22(8):885-93.
19. AL-Gabri MM, Mohammed MA, Mehany MM. Factors Affecting Nurses Compliance Regarding the Care of Patients with Chest Trauma.
20. Al-Rafay SS, Al-Sharkawy SS. Educational Outcomes Associated With Providing a Comprehensive Guidelines Program About Nursing Care of Preterm Neonates Receiving Total

- Parenteral Nutrition. *Clin Nurs Res*. 2012;21(2):142-58.
21. Attia MAS, Youseff MRL, Abd El Fatah SAM, Ibrahim SK, Gomaa NAS. The relationship between health care providers' perceived work climate, organizational commitment, and caring efficacy at pediatric intensive care units, Cairo University. *Int J Health Plan Manag*. 2020;35(2):469-81.
  22. Mohamed SS, Ali BAEM, Abd-El-Karim HE, Masoed ES. Nurses' knowledge and performance regarding infection control during milk formula preparation and its effect on neonates at El-Minia city hospitals. *The Journal of American Science*. 2012;8(10):782-7.
  23. Selim AA, Ely EW. Delirium the under-recognised syndrome: survey of healthcare professionals' awareness and practice in the intensive care units. *Journal of Clinical Nursing*. 2017;26(5-6):813-24.
  24. Eltaybani S, Abdelwareth M, Abou-Zeid NA, Ahmed N. Recommendations to prevent nursing errors: Content analysis of semi-structured interviews with intensive care unit nurses in a developing country. *Journal of Nursing Management*. 2020;28(3):690-8.
  25. Aloush SM, Abdelkader FA, Al-Sayaghi K, Tawalbeh LI, Suliman M, Al Bashtawy M, et al. Compliance of Nurses and Hospitals With Ventilator-Associated Pneumonia Prevention Guidelines: A Middle Eastern Survey. *Journal of Nursing Care Quality*. 2018;33(3):E8-E14.
  26. Gorman LL, McDowell JRS. Identifying the needs of critical and acute cardiac care nurses within the first two years of practice in Egypt using a nominal group technique. *Nurse Education in Practice*. 2018;28:127-34.
  27. Khallil NS. Critical care nurses' use of non-pharmacological pain management methods in Egypt. *Appl Nurs Res*. 2018;44:33-8.
  28. Kandeel N, Ibrahim Y. Student Nurses' Perception on the Impact of Information Technology on Teaching and Learning. *Int J Inf Commun Technol Educ*. 2010;6(3):38-50.
  29. Zyoud SH, Khaled SM, Kawasmi BM, Habeba AM, Hamadneh AT, Anabosi HH, et al. Knowledge about the administration and regulation of high alert medications among nurses in Palestine: a cross-sectional study. *Bmc Nursing*. 2019;18.
  30. Opore MA. Ghana. In: Klopper HC, Uys LR, editors. *The State of Nursing and Nursing Education in Africa: A Country-by-Country Review*. Indianapolis: Sigma Theta Tau International; 2013. p. 93-112.
  31. Kimani G, Maina F, Rithara S. Perception of palliative care course among other programs in a government learning institution. *Supportive Care in Cancer*. 2017;25(2 Supplement 1):S106.
  32. Waweru-Siika W, Mung'ayi V, Misango D, Mogi A, Kisia A, Ngumi Z. The history of critical care in Kenya. *J Crit Care*. 2020;55:122-7.
  33. Karani AK, Milimo BW, Kuria RW. Kenya. In: Klopper H, Uys L, editors. *The State of Nursing and Nursing Education in Africa: A Country-by-Country Review*. Indianapolis: Sigma Theta Tau International; 2013. p. 113-26.
  34. Bruce JC, Schmollgruber S, Baumann J. Intercountry master's degree in nursing: policy implications for the Mozambican health system. *International Nursing Review*. 2018;65(3):425-33.
  35. Mukamana D. Rwanda. In: Klopper H, Uys LR, editors. *The State of Nursing and Nursing Education in Africa: A Country-by-Country Review*. Indianapolis: Sigma Theta Tau International; 2013. p. 231-47.
  36. Sawe HR, Mfinanga JA, Lidenge SJ, Mpondo BCT, Msangi S, Lugazia E, et al. Disease patterns and clinical outcomes of patients admitted in intensive care units of tertiary referral hospitals of Tanzania. *BMC Int Health Hum Rights*. 2014;14.
  37. Baker T, Lugazia E, Eriksen J, Mwafongo V, Irestedt L, Konrad D. Emergency and critical care services in Tanzania: a survey of ten hospitals. *BMC Health Services Research*. 2013;13.
  38. Atumanya P, Sendagire C, Wabule A, Mukisa J, Ssemogerere L, Kwizera A, et al. Assessment of the current capacity of intensive care units in Uganda; A descriptive study. *Journal of Critical Care*. 2020;55:95-9.
  39. Carter C, Snell D. Nursing the critically ill surgical patient in Zambia. *Br J Nurs*.

2016;25(20):1123-8.

40. Tadyanemhandu C, van Aswegen H, Ntsiea V. Early mobilisation practices of patients in intensive care units in Zimbabwean government hospitals - a cross-sectional study. *South Afr J Crit Care*. 2018;34(1):16-21.
41. Rungta N, Zirpe KG, Dixit SB, Mehta Y, Chuadhry D, Govil D, et al. Indian Society of Critical Care Medicine Experts Committee Consensus Statement on ICU Planning and Designing, 2020. *Indian Journal of Critical Care Medicine*. 2020;24:S43-S60.
42. Haniffa R, De Silva AP, Iddagoda S, Batawalage H, De Silva S, Mahipala PG, et al. A cross-sectional survey of critical care services in Sri Lanka: A lower middle-income country. *Journal of Critical Care*. 2014;29(5):764-8.
43. Stephens T, De Silva AP, Beane A, Welch J, Sigera C, De Alwis S, et al. Capacity building for critical care training delivery: Development and evaluation of the Network for Improving Critical Care Skills Training (NICST) programme in Sri Lanka. *Intensive & critical care nursing*. 2017;39:28-36.
44. Charlton S, O'Reilly G, Jones T, Fitzgerald M. Emergency care in developing nations: The role of emergency nurses in Galle, Sri Lanka. *Australas Emerg Nurs J*. 2011;14(2):69-74.
45. Barkley AS, Medina-Beckwith J, Sothea S, Pak S, Durfy SJ, Lele AV. Teaching the Emergency Neurologic Life Support Course at Two Major Hospitals in Phnom Penh, Cambodia. *World neurosurgery*. 2020.
46. Losonczy LI, Barnes SL, Liu S, Williams SR, McCurdy MT, Lemos V, et al. Critical care capacity in Haiti: A nationwide cross-sectional survey. *PLoS One*. 2019;14(6):e0218141.
47. Guiles S, Lemons J, Trautman M, Bucher S, Songok J, Gisore P. The Implementation of a Neonatal Nurse Training Program at the Riley Mother Baby Hospital of Kenya. *Newborn Infant Nurs Rev*. 2016;16(4):184-9.
48. Phuma-Ngaiyaye E, Kalembo FW. Supporting mothers to bond with their newborn babies: Strategies used in a neonatal intensive care unit at a tertiary hospital in Malawi. *International Journal of Nursing Sciences*. 2016;3(4):362-6.
49. Bruce JC, Dippenaar J, Schmollgruber S, Mphuthi DD, Huiskamp A. Advancing nursing scholarship: the Mozambique model. *Global Health Action*. 2017;10:1351116.
50. Macindo JRB, Danganan MPB, Soriano CAF, Kho NSR, Bongar MVV. A conjoint analysis of the acute and critical care experiential learning preferences of Baccalaureate student nurses. *Nurse Education in Practice*. 2019;36:125-31.
51. Zahran EM, Taha EE. Integrating evidence based nursing into the critical care nursing course: challenges from students' perspectives. *The Journal of American Science*. 2011;7(7):135-44.
52. MacLeod JBA, Jones T, Aphivantrakul P, Chupp M, Poenaru D. Evaluation of fundamental critical care course in kenya: Knowledge, attitude, and practice. *Journal of Surgical Research*. 2011;167(2):223-30.
53. Spiwak R, Lett R, Rwanyuma L, Logsetty S. Creation of a standardized burn course for Low Income Countries: Meeting local needs. *Burns*. 2014;40(7):1292-9.
54. Mbwele B, Ide NL, Mrema JG, Sarah APW, Melnick JA, Manongi R. Learning from Health Care Workers' Opinions for Improving Quality of neonatal Health Care in Kilimanjaro region, northeast Tanzania. *Ann Med Health Sci Res*. 2014;4(1):105-14.
55. Atreya MR, Lorenz JM, Narendran V. Provider Perceptions of Bubble Continuous Positive Airway Pressure and Barriers to Implementation in a Level III Neonatal Unit in South India. *Adv Neonatal Care*. 2018;18(6):500-6.
56. Bana S, Punjwani R, Khattoon A. Capacity building strategies for critical pediatric oncology nursing in a limited resource setting: A report of Children Cancer Hospital, Karachi, Pakistan. *Pediatric Blood and Cancer*. 2015;62(Supplement 4):S190.
57. Kandeel NA, Attia AK. Physical restraints practice in adult intensive care units in Egypt. *Nursing & Health Sciences*. 2013;15(1):79-85.

58. Munyiginya P, Brysiewicz P, Mill J. Critical care nursing practice and education in Rwanda. *South Afr J Crit Care*. 2016;32(2):55-7.
59. Saria VF, Mselle LT, Sicheloff BA. Parents and nurses telling their stories: the perceived needs of parents caring for critically ill children at the Kilimanjaro Christian Medical Centre in Tanzania. *BMC Nursing*. 2019;18(1).

*Bibliography of citations in Table 3*

1. Kassew T, Tilahun AD, Liyew B. Nurses' Knowledge, Attitude, and Influencing Factors regarding Physical Restraint Use in the Intensive Care Unit: A Multicenter Cross-Sectional Study. *Crit Care Res Pract*. 2020;2020.
2. Okech UK, Chokwe T, Mung'ayi V. The operational setup of intensive care units in a low income country in East Africa. *EAsT AFRICAN MEDICAL JOURNAL*. 2015;92(2).
3. Gundo R. Contextual issues that influence preparedness of nurses for critical care nursing practice in Malawi. *Malawi Med J*. 2019;31(2):138-43.
4. Phuma-Ngaiyaye E, Kalembo FW. Supporting mothers to bond with their newborn babies: Strategies used in a neonatal intensive care unit at a tertiary hospital in Malawi. *International Journal of Nursing Sciences*. 2016;3(4):362-6.
5. Bruce JC, Dippenaar J, Schmollgruber S, Mphuthi DD, Huiskamp A. Advancing nursing scholarship: the Mozambique model. *Global Health Action*. 2017;10:1351116.
6. Ilesanmi RE, Olabisi P. Assessment of Common Interventions and Perceived Barriers to Pressure Ulcer Prevention in Southwest Nigeria. *J Wound Ostomy Cont Nurs*. 2014;41(3):242-6.
7. Shobowale EO, Onyedibe KI, Adegunle KB, Elikwu CJ. An Observational and Trend Analysis Study of Hand Hygiene Practices of Healthcare Workers at A Private Nigerian Tertiary Hospital. *Ann Med Health Sci Res*. 2017;7:84-9.
8. Ufashingabire CM, Nsereko E, Njunwa KJ, Brysiewicz P. Knowledge and attitudes of nurses regarding pain in the intensive care unit patients in Rwanda. *Rwanda Journal*. 2016;3(1):21-6.
9. Mbwele B, Ide NL, Mrema JG, Sarah APW, Melnick JA, Manongi R. Learning from Health Care Workers' Opinions for Improving Quality of neonatal Health Care in Kilimanjaro region, northeast Tanzania. *Ann Med Health Sci Res*. 2014;4(1):105-14.
10. Cunningham C, Brysiewicz P, Sepeku A, White L, Murray B, Lobue N, et al. Developing an emergency nursing short course in Tanzania. *Afr J Emerg Med*. 2017;7(4):147-50.
11. MacDonell R, Koe S, Okafor I, James A, Ahern C, Scanlan T. Building resuscitation capability in low resource settings; development of the PAIRS course (outlining the development of a tailored paediatric resuscitation programme for low resource healthcare settings). *Archives of Disease in Childhood*. 2019;104(Supplement 3):A259.
12. Spiwak R, Lett R, Rwanyuma L, Logsetty S. Creation of a standardized burn course for Low Income Countries: Meeting local needs. *Burns*. 2014;40(7):1292-9.
13. Byrne-Davis L, Slattery H, Whiteside S, Moro E, Jackson M, Onyachi N, et al. Efficacy and acceptability of an acute illness management course delivered to staff and students in Uganda by staff from the UK. *Special Issue: Disease elimination*. 2015;7(5):360-6.
14. Marzuola JM. Teaching Strategies to Reduce VAP at Mulago Hospital: A Capstone Project. 2016.
15. Kizza IB, Muliira JK. Nurses' pain assessment practices with critically ill adult patients. *International Nursing Review*. 2015;62(4):573-82.
16. Nakate GM, Emelonye AU. Examining nursing practices for management of sepsis in low income countries: the case of Uganda. *World*. 2018;12(1):2.
17. Carter C, Mukonka PS, Sitwala LJ, Howard-Hunt B, Notter J. The development of critical care nursing education in Zambia. *British journal of nursing (Mark Allen Publishing)*. 2020;29(9):499-505.
18. Carter C, Snell D. Nursing the critically ill surgical patient in Zambia. *Br J Nurs*. 2016;25(20):1123-8.

19. Harrington J, Hall D, Wang TY, Murali M, Mwansa S. A quality improvement project to prevent hyperoxia in a developing world intensive care unit. *Critical Care*. 2020;24(Supplement 1).
20. . !!! INVALID CITATION !!! (20-29).
21. Pradhan N, Lama S, Mandal G, Shrestha E. Physical restraining: Nurses knowledge and practice in Tertiary Care Hospital of Eastern Nepal. *Nurs Open*. 2019;6(3):1029-37.
22. Niemczura J. Critical care nursing in nepal. *ANA Maine Journal*. 2015:8.
23. Hassan N, Afzal M, Sehar S, Gilani A. Effect of Educational Program on Pressure Ulcer Prevention Intervention among Nurses of Intensive Care Units at a Public Hospital, Pakistan. *Clinical Social Work and Health Intervention*. 2020;11(4):38-45.
24. Manasia RJM, Husain SJ, Hooda K, Imran M, Bailey C. Therapeutic Hypothermia Post-Cardiac Arrest A Clinical Nurse Specialist Initiative in Pakistan. *Clin Nurse Spec*. 2014;28(4):231-9.
25. Goonewardena CS, Colombage TD. Knowledge and practices of nurses caring for patients with endotracheal tube admitted to intensive care units in National Hospital of Sri Lanka. *Sri Lankan J Anaesthesiol*. 2020;28(2):94-100.
26. Koy V, Yunibhand J, Turale S. "It is really so exhausting": Exploring intensive care nurses' perceptions of 24-hour long shifts. *Journal of Clinical Nursing*.10.
27. Barkley AS, Medina-Beckwith J, Sothea S, Pak S, Durfy SJ, Lele AV. Teaching the Emergency Neurologic Life Support Course at Two Major Hospitals in Phnom Penh, Cambodia. *World neurosurgery*. 2020.
28. Neely J, Bashford T, Aldam P, Patel D, Ward L, Wilson J, et al. Developing sustainable Systems-Based Training in Trauma Intensive Care in Myanmar. *Journal of the Intensive Care Society*. 2018;19(2 Supplement 1):152-3.
29. Paguio JT, Banayat AC. Commentary on challenges to critical care nursing practice in the Philippines. *The World of Critical Care Nursing*. 2018;12(1).
30. Martinez RCKP, Rogado MIC, Serondo DJF, Soriano GP, Ilano KCS. Critical Care Nursing in the Philippines: Historical Past, Current Practices, and Future Directions. *Critical care nursing clinics of North America*. 2021;33(1):75-87.
31. Fadadu PP, Liu JC, Schiltz BM, Xoay TD, Phuc PH, Kumbamu A, et al. A Mixed-Methods Exploration of Pediatric Intensivists' Attitudes toward End-of-Life Care in Vietnam. *J Palliat Med*. 2019;22(8):885-93.
32. Emani SS, Allan CK, Forster T, Fisk AC, Lagrasta C, Zheleva B, et al. Simulation training improves team dynamics and performance in a low-resource cardiac intensive care unit. *Ann Pediatr Cardiol*. 2018;11(2):130-6.
33. Khallil NS. Critical care nurses' use of non-pharmacological pain management methods in Egypt. *Appl Nurs Res*. 2018;44:33-8.
34. Eltaybani S, Abdelwareth M, Abou-Zeid NA, Ahmed N. Recommendations to prevent nursing errors: Content analysis of semi-structured interviews with intensive care unit nurses in a developing country. *Journal of Nursing Management*. 2020;28(3):690-8.
35. AL-Gabri MM, Mohammed MA, Mehany MM. Factors Affecting Nurses Compliance Regarding the Care of Patients with Chest Trauma.
36. Al-Rafay SS, Al-Sharkawy SS. Educational Outcomes Associated With Providing a Comprehensive Guidelines Program About Nursing Care of Preterm Neonates Receiving Total Parenteral Nutrition. *Clin Nurs Res*. 2012;21(2):142-58.
37. Mohamed SS, Ali BAEM, Abd-El-Karim HE, Masoed ES. Nurses' knowledge and performance regarding infection control during milk formula preparation and its effect on neonates at El-Minia city hospitals. *The Journal of American Science*. 2012;8(10):782-7.
38. Zahran EM, Taha EE. Integrating evidence based nursing into the critical care nursing course: challenges from students' perspectives. *The Journal of American Science*. 2011;7(7):135-44.
39. Kandeel NA, Attia AK. Physical restraints practice in adult intensive care units in Egypt. *Nursing & Health Sciences*. 2013;15(1):79-85.

40. Zyoud SH, Khaled SM, Kawasmi BM, Habeba AM, Hamadne AT, Anabosi HH, et al. Knowledge about the administration and regulation of high alert medications among nurses in Palestine: a cross-sectional study. *BMC Nursing*. 2019;18.
41. Guiles S, Lemons J, Trautman M, Bucher S, Songok J, Gisore P. The Implementation of a Neonatal Nurse Training Program at the Riley Mother Baby Hospital of Kenya. *Newborn Infant Nurs Rev*. 2016;16(4):184-9.
42. Kumar R, Canarie MF. Developing Pediatric Critical Care in Kenya\*. *Pediatric Critical Care Medicine*. 2019;20(12):E538-E45.
43. Waweru-Siika W, Mung'ayi V, Misango D, Mogi A, Kisia A, Ngumi Z. The history of critical care in Kenya. *J Crit Care*. 2020;55:122-7.
44. Gundo R. Development, Implementation and Evaluation of an In-service Training Programme for Critical Care Nurses in Malawi. 2019.
45. Munyiginya P, Brysiewicz P, Mill J. Critical care nursing practice and education in Rwanda. *South Afr J Crit Care*. 2016;32(2):55-7.
46. Atumanya P, Sendagire C, Wabule A, Mukisa J, Ssemogerere L, Kwizera A, et al. Assessment of the current capacity of intensive care units in Uganda; A descriptive study. *Journal of Critical Care*. 2020;55:95-9.
47. Mwewa B, Mweemba P. Knowledge and utilization of ICU admission criteria and guidelines, Lusaka, Zambia. *Medical Journal of Zambia*. 2010;37(3):143-52.
48. Tadyanemhandu C, van Aswegen H, Ntsiea V. Early mobilisation practices of patients in intensive care units in Zimbabwean government hospitals - a cross-sectional study. *South Afr J Crit Care*. 2018;34(1):16-21.
49. Sahni N, Biswal M, Gandhi K, Kaur K, Saini V, Yaddanapudi LN. Effect of Intensive Education and Training of Nurses on Ventilator-associated Pneumonia and Central Line-associated Bloodstream Infection Incidence in Intensive Care Unit at a Tertiary Care Center in North India. *Indian Journal of Critical Care Medicine*. 2017;21(11):779-82.
50. Atreya MR, Lorenz JM, Narendran V. Provider Perceptions of Bubble Continuous Positive Airway Pressure and Barriers to Implementation in a Level III Neonatal Unit in South India. *Adv Neonatal Care*. 2018;18(6):500-6.
51. Rungta N, Zirpe KG, Dixit SB, Mehta Y, Chuadhry D, Govil D, et al. Indian Society of Critical Care Medicine Experts Committee Consensus Statement on ICU Planning and Designing, 2020. *Indian Journal of Critical Care Medicine*. 2020;24:S43-S60.
52. Khanal A, Sharma A, Basnet S. Current State of Pediatric Intensive Care and High Dependency Care in Nepal. *Pediatric Critical Care Medicine*. 2016;17(11):1032-40.
53. Limbu S, Kongsuwan W, Yodchai K. Lived experiences of intensive care nurses in caring for critically ill patients. *Nursing in Critical Care*. 2019;24(1):9-14.
54. Charlton S, O'Reilly G, Jones T, Fitzgerald M. Emergency care in developing nations: The role of emergency nurses in Galle, Sri Lanka. *Australas Emerg Nurs J*. 2011;14(2):69-74.
55. Haniffa R, De Silva AP, Iddagoda S, Batawalage H, De Silva S, Mahipala PG, et al. A cross-sectional survey of critical care services in Sri Lanka: A lower middle-income country. *Journal of Critical Care*. 2014;29(5):764-8.
56. Gautam P, Acharya SP, Williams G. Formation of the Southern Asia Association for Regional Cooperation Federation of Critical Care Nurses. *The World of Critical Care Nursing*. 2018;12(1).
57. Stephens T, De Silva AP, Beane A, Welch J, Sigera C, De Alwis S, et al. Capacity building for critical care training delivery: Development and evaluation of the Network for Improving Critical care Skills Training (NICST) programme in Sri Lanka. *Intensive & critical care nursing*. 2017;39:28-36.
58. Westcott M, Martiniuk ALC, Fowler RA, Adhikari NKJ, Dalipanda T. Critical care resources in the Solomon Islands: a cross-sectional survey. *BMC Int Health Hum Rights*. 2012;12:9.
59. Attia MAS, Youseff MRL, Abd El Fatah SAM, Ibrahim SK, Gomaa NAS. The relationship

- between health care providers' perceived work climate, organizational commitment, and caring efficacy at pediatric intensive care units, Cairo University. *Int J Health Plan Manag.* 2020;35(2):469-81.
60. Aloush SM, Abdelkader FA, Al-Sayaghi K, Tawalbeh LI, Suliman M, Al Bashtawy M, et al. Compliance of Nurses and Hospitals With Ventilator-Associated Pneumonia Prevention Guidelines: A Middle Eastern Survey. *Journal of Nursing Care Quality.* 2018;33(3):E8-E14.
61. MacLeod JBA, Jones T, Aphivantrakul P, Chupp M, Poenaru D. Evaluation of fundamental critical care course in kenya: Knowledge, attitude, and practice. *Journal of Surgical Research.* 2011;167(2):223-30.
62. Sawe HR, Mfinanga JA, Lidenge SJ, Mpondo BCT, Msangi S, Lugazia E, et al. Disease patterns and clinical outcomes of patients admitted in intensive care units of tertiary referral hospitals of Tanzania. *BMC Int Health Hum Rights.* 2014;14.
63. Baker T, Lugazia E, Eriksen J, Mwafongo V, Irestedt L, Konrad D. Emergency and critical care services in Tanzania: a survey of ten hospitals. *BMC Health Services Research.* 2013;13.
64. Patel DV, Nimbalkar SM, Singh US, Kharod NM. Acceptability and implementation of FIMNCI by medical officers and staff nurses in government health institutions of Western India. *Archives of Disease in Childhood.* 2012;97(SUPPL. 2):A489-A90.
65. Sharma R, Jagota R, Koushal V. Study of Knowledge, Awareness and Practices of Infection Control among ICU Staff of a Multispecialty Tertiary Level Teaching Institute of North India. *J Health Manag.* 2013;15(1):45-56.
66. Paul R, McCutcheon SP, Zenios SA, Tregarthen JP, Denend LT. Sustaining Pressure Ulcer Best Practices in a High-Volume Cardiac Care Environment How one hospital reduced the incidence of hospital-acquired pressure ulcers to zero. *Am J Nurs.* 2014;114(8):34-44.
67. Swathi S, Ramesh A, Nagapoornima M, Fernandes LM, Jisina C, Rao PNS, et al. Sustaining a "culture of silence" in the neonatal intensive care unit during nonemergency situations: A grounded theory on ensuring adherence to behavioral modification to reduce noise levels. *Int J Qual Stud Health Well-Being.* 2014;9:1-10.
68. Rungta N, Zirpe KG, Dixit SB, Mehta Y, Chaudhry D, Govil D, et al. Indian Society of Critical Care Medicine Experts Committee Consensus Statement on ICU Planning and Designing, 2020. *Indian journal of critical care medicine : peer-reviewed, official publication of Indian Society of Critical Care Medicine.* 2020;24(Suppl 1):S43.

*Bibliography of citations in Table 4*

1. Gundo R. Contextual issues that influence preparedness of nurses for critical care nursing practice in Malawi. *Malawi Med J.* 2019;31(2):138-43.
2. Gundo R. Development, Implementation and Evaluation of an In-service Training Programme for Critical Care Nurses in Malawi. 2019.
3. Bruce JC, Dippenaar J, Schmollgruber S, Mphuthi DD, Huiskamp A. Advancing nursing scholarship: the Mozambique model. *Global Health Action.* 2017;10:1351116.
4. Nankundwa E, Brysiewicz P. Lived experiences of Rwandan ICU nurses caring for patients with a do-not-resuscitate order. *South Afr J Crit Care.* 2017;33(1):19-22.
5. Munyiginya P, Brysiewicz P, Mill J. Critical care nursing practice and education in Rwanda. *South Afr J Crit Care.* 2016;32(2):55-7.
6. Cunningham C, Brysiewicz P, Sepeku A, White L, Murray B, Lobue N, et al. Developing an emergency nursing short course in Tanzania. *Afr J Emerg Med.* 2017;7(4):147-50.
7. Kizza IB, Muliira JK. Nurses' pain assessment practices with critically ill adult patients. *International Nursing Review.* 2015;62(4):573-82.
8. Marzuola JM. Teaching Strategies to Reduce VAP at Mulago Hospital: A Capstone Project. 2016.
9. Carter C, Mukonka PS, Sitwala LJ, Howard-Hunt B, Notter J. The development of critical care nursing education in Zambia. *British journal of nursing (Mark Allen Publishing).* 2020;29(9):499-505.

10. Klopper H, Uys LR. The state of nursing and nursing education in Africa: a country-by-country review: Sigma Theta Tau; 2013.
11. Stephens T, De Silva AP, Beane A, Welch J, Sigera C, De Alwis S, et al. Capacity building for critical care training delivery: Development and evaluation of the Network for Improving Critical care Skills Training (NICST) programme in Sri Lanka. *Intensive & critical care nursing*. 2017;39:28-36.
12. Paguio JT, Banayat AC. Commentary on challenges to critical care nursing practice in the Philippines. *The World of Critical Care Nursing*. 2018;12(1).
13. Khallil NS. Critical care nurses' use of non-pharmacological pain management methods in Egypt. *Appl Nurs Res*. 2018;44:33-8.
14. Gorman LL, McDowell JRS. Identifying the needs of critical and acute cardiac care nurses within the first two years of practice in Egypt using a nominal group technique. *Nurse Education in Practice*. 2018;28:127-34.
15. Zyoud SH, Khaled SM, Kawasmi BM, Habeba AM, Hamadneh AT, Anabosi HH, et al. Knowledge about the administration and regulation of high alert medications among nurses in Palestine: a cross-sectional study. *Bmc Nursing*. 2019;18:17.

*Bibliography of citations in Table 5*

1. Kimani G, Maina F, Rithara S. Perception of palliative care course among other programs in a government learning institution. *Supportive Care in Cancer*. 2017;25(2 Supplement 1):S106.
2. Waweru-Siika W, Mung'ayi V, Misango D, Mogi A, Kisia A, Ngumi Z. The history of critical care in Kenya. *J Crit Care*. 2020;55:122-7.
3. Guiles S, Lemons J, Trautman M, Bucher S, Songok J, Gisore P. The Implementation of a Neonatal Nurse Training Program at the Riley Mother Baby Hospital of Kenya. *Newborn Infant Nurs Rev*. 2016;16(4):184-9.
4. Kumar R, Canarie MF. Developing Pediatric Critical Care in Kenya\*. *Pediatric Critical Care Medicine*. 2019;20(12):E538-E45.
5. MacLeod JBA, Jones T, Aphivantrakul P, Chupp M, Poenaru D. Evaluation of fundamental critical care course in kenya: Knowledge, attitude, and practice. *Journal of Surgical Research*. 2011;167(2):223-30.
6. Hernandez J, Kioko M, Adeyinka A, Pinto R, Mercredi G, Petrescu M, et al. Pediatric fundamentals of critical care support (PFCCS) course performance among staff from U.S. and resource-limited countries. *Pediatric Critical Care Medicine*. 2012;13(6):718.
7. Richards C, Fox J, Sheraton T. A questionnaire survey to aid development of a new critical care course in Liberia, West Africa. *European Journal of Anaesthesiology*. 2014;31(SUPPL. 52):242.
8. Gundo R. Development, Implementation and Evaluation of an In-service Training Programme for Critical Care Nurses in Malawi. 2019.
9. Bruce JC, Schmollgruber S, Baumann J. Intercountry master's degree in nursing: policy implications for the Mozambican health system. *International Nursing Review*. 2018;65(3):425-33.
10. Bruce JC, Dippenaar J, Schmollgruber S, Mphuthi DD, Huiskamp A. Advancing nursing scholarship: the Mozambique model. *Global Health Action*. 2017;10:1351116.
11. Munyiginya P, Brysiewicz P, Mill J. Critical care nursing practice and education in Rwanda. *South Afr J Crit Care*. 2016;32(2):55-7.
12. Mukamana D. Rwanda. In: Klopper H, Uys LR, editors. *The State of Nursing and Nursing Education in Africa: A Country-by-Country Review*. Indianapolis: Sigma Theta Tau International; 2013. p. 231-47.
13. Cunningham C, Brysiewicz P, Sepeku A, White L, Murray B, Lobue N, et al. Developing an emergency nursing short course in Tanzania. *Afr J Emerg Med*. 2017;7(4):147-50.
14. MacDonell R, Koe S, Okafor I, James A, Ahern C, Scanlan T. Building resuscitation capability

- in low resource settings; development of the PAIRS course (outlining the development of a tailored paediatric resuscitation programme for low resource healthcare settings). *Archives of Disease in Childhood*. 2019;104(Supplement 3):A259.
15. Mbwele B, Ide NL, Mrema JG, Sarah APW, Melnick JA, Manongi R. Learning from Health Care Workers' Opinions for Improving Quality of neonatal Health Care in Kilimanjaro region, northeast Tanzania. *Ann Med Health Sci Res*. 2014;4(1):105-14.
  16. Carter C, Mukonka PS, Sitwala LJ, Howard-Hunt B, Notter J. The development of critical care nursing education in Zambia. *British journal of nursing* (Mark Allen Publishing). 2020;29(9):499-505.
  17. Klopper H, Uys LR. The state of nursing and nursing education in Africa: a country-by-country review: Sigma Theta Tau; 2013.
  18. Patel DV, Nimbalkar SM, Singh US, Kharod NM. Acceptability and implementation of FIMNCI by medical officers and staff nurses in government health institutions of Western India. *Archives of Disease in Childhood*. 2012;97(SUPPL. 2):A489-A90.
  19. Khanal A, Sharma A, Basnet S. Current State of Pediatric Intensive Care and High Dependency Care in Nepal. *Pediatric Critical Care Medicine*. 2016;17(11):1032-40.
  20. Bana S, Punjwani R, Khatoon A. Capacity building strategies for critical pediatric oncology nursing in a limited resource setting: A report of Children Cancer Hospital, Karachi, Pakistan. *Pediatric Blood and Cancer*. 2015;62(Supplement 4):S190.
  21. Stephens T, De Silva AP, Beane A, Welch J, Sigera C, De Alwis S, et al. Capacity building for critical care training delivery: Development and evaluation of the Network for Improving Critical care Skills Training (NICST) programme in Sri Lanka. *Intensive & critical care nursing*. 2017;39:28-36.
  22. Haniffa R, De Silva AP, Iddagoda S, Batawalage H, De Silva S, Mahipala PG, et al. A cross-sectional survey of critical care services in Sri Lanka: A lower middle-income country. *Journal of Critical Care*. 2014;29(5):764-8.
  23. Charlton S, O'Reilly G, Jones T, Fitzgerald M. Emergency care in developing nations: The role of emergency nurses in Galle, Sri Lanka. *Australas Emerg Nurs J*. 2011;14(2):69-74.
  24. Gautam P, Acharya SP, Williams G. Formation of the Southern Asia Association for Regional Cooperation Federation of Critical Care Nurses. *The World of Critical Care Nursing*. 2018;12(1).
  25. Neely J, Bashford T, Aldam P, Patel D, Ward L, Wilson J, et al. Developing sustainable Systems-Based Training in Trauma Intensive Care in Myanmar. *Journal of the Intensive Care Society*. 2018;19(2 Supplement 1):152-3.
  26. Paguio JT, Banayat AC. Commentary on challenges to critical care nursing practice in the Philippines. *The World of Critical Care Nursing*. 2018;12(1).
  27. Bechara AD, Tan M, Nguyen T, Le Doan A, Zheleva B. Creating professional development opportunities for pediatric cardiac critical care nurses in South Vietnam. *Cardiology in the Young*. 2017;27(4):S229.
  28. Kandeel N, Ibrahim Y. Student Nurses' Perception on the Impact of Information Technology on Teaching and Learning. *Int J Inf Commun Technol Educ*. 2010;6(3):38-50.
  29. Zahran EM, Taha EE. Integrating evidence based nursing into the critical care nursing course: challenges from students' perspectives. *The Journal of American Science*. 2011;7(7):135-44.
  30. Zyoud SH, Khaled SM, Kawasmi BM, Habeba AM, Hamadneh AT, Anabosi HH, et al. Knowledge about the administration and regulation of high alert medications among nurses in Palestine: a cross-sectional study. *Bmc Nursing*. 2019;18.
  31. Lutz J, Augustin M, Patel CC, Fenestor M, Patel A, Rock S, et al. IMPLEMENTATION OF A SUCCESSFUL INTENSIVE CARE NURSING STAFF DEVELOPMENT PROGRAM IN HAITI. *Critical Care Medicine*. 2014;42(12):1.
  32. Gundo R. Development, Implementation and Evaluation of an In-Service

**Training Programme for Critical Care Nurses in Malawi 2019.**

33. Ufashingabire CM, Nsereko E, Njunwa KJ, Brysiewicz P. Knowledge and attitudes of nurses regarding pain in the intensive care unit patients in Rwanda. *Rwanda Journal*. 2016;3(1):21-6.
34. Harrington J, Hall D, Wang TY, Murali M, Mwansa S. A quality improvement project to prevent hyperoxia in a developing world intensive care unit. *Critical Care*. 2020;24(Supplement 1).
35. Sathish Y, Lewis LE, Noronha JA, Nayak BS, Pai MS, Altimier L. Promoting developmental supportive care in preterm infants and families in a level III neonatal intensive care unit (NICU) setting in India. *Nurse Education in Practice*. 2019;40:8.
36. Atreya MR, Lorenz JM, Narendran V. Provider Perceptions of Bubble Continuous Positive Airway Pressure and Barriers to Implementation in a Level III Neonatal Unit in South India. *Adv Neonatal Care*. 2018;18(6):500-6.
37. Swathi S, Ramesh A, Nagapoornima M, Fernandes LM, Jisina C, Rao PNS, et al. Sustaining a "culture of silence" in the neonatal intensive care unit during nonemergency situations: A grounded theory on ensuring adherence to behavioral modification to reduce noise levels. *Int J Qual Stud Health Well-Being*. 2014;9:1-10.
38. Acharya R, Mishra SB, Ipsita S, Azim A. Impact of Nursing Education on CLABSI Rates: An Experience from a Tertiary Care Hospital in Eastern India. *Indian Journal of Critical Care Medicine*. 2019;23(7):316-9.
39. Dongara AR, Nimbalkar SM, Phatak AG, Patel DV, Nimbalkar AS. An Educational Intervention to Improve Nurses' Understanding of Pain in Children in Western India. *Pain Manag Nurs*. 2017;18(1):24-32.
40. Paul R, McCutcheon SP, Zenios SA, Tregarthen JP, Denend LT. Sustaining Pressure Ulcer Best Practices in a High-Volume Cardiac Care Environment How one hospital reduced the incidence of hospital-acquired pressure ulcers to zero. *Am J Nurs*. 2014;114(8):34-44.
41. Sahni N, Biswal M, Gandhi K, Kaur K, Saini V, Yaddanapudi LN. Effect of Intensive Education and Training of Nurses on Ventilator-associated Pneumonia and Central Line-associated Bloodstream Infection Incidence in Intensive Care Unit at a Tertiary Care Center in North India. *Indian Journal of Critical Care Medicine*. 2017;21(11):779-82.
42. Sharma R, Jagota R, Koushal V. Study of Knowledge, Awareness and Practices of Infection Control among ICU Staff of a Multispecialty Tertiary Level Teaching Institute of North India. *J Health Manag*. 2013;15(1):45-56.
43. Tripathy S, Routray PK, Mishra JC. Intensive Care Nurses' Attitude on Palliative and End of Life Care. *Indian Journal of Critical Care Medicine*. 2017;21(10):655-9.
44. Pradhan N, Lama S, Mandal G, Shrestha E. Physical restraining: Nurses knowledge and practice in Tertiary Care Hospital of Eastern Nepal. *Nurs Open*. 2019;6(3):1029-37.
45. Manasia RJM, Husain SJ, Hooda K, Imran M, Bailey C. Therapeutic Hypothermia Post-Cardiac Arrest A Clinical Nurse Specialist Initiative in Pakistan. *Clin Nurse Spec*. 2014;28(4):231-9.
46. Barkley AS, Medina-Beckwith J, Sothea S, Pak S, Durfy SJ, Lele AV. Teaching the Emergency Neurologic Life Support Course at Two Major Hospitals in Phnom Penh, Cambodia. *World neurosurgery*. 2020.
47. Emani SS, Allan CK, Forster T, Fisk AC, Lagrasta C, Zheleva B, et al. Simulation training improves team dynamics and performance in a low-resource cardiac intensive care unit. *Ann Pediatr Cardiol*. 2018;11(2):130-6.
48. Al-Gabri MM, Mohammed MA, Mehany MM. Factors Affecting Nurses Compliance Regarding the Care of Patients with Chest Trauma.
49. Al-Rafay SS, Al-Sharkawy SS. Educational Outcomes Associated With Providing a Comprehensive Guidelines Program About Nursing Care of Preterm Neonates Receiving Total Parenteral Nutrition. *Clin Nurs Res*. 2012;21(2):142-58.
50. Mohamed SS, Ali BAEM, Abd-El-Karim HE, Masoed ES. Nurses' knowledge and performance regarding infection control during milk formula preparation and its effect on neonates at El-Minia city hospitals. *The Journal of American Science*. 2012;8(10):782-7.

51. Eltaybani S, Abdelwareth M, Abou-Zeid NA, Ahmed N. Recommendations to prevent nursing errors: Content analysis of semi-structured interviews with intensive care unit nurses in a developing country. *Journal of Nursing Management*. 2020;28(3):690-8.
52. Aloush SM, Abdelkader FA, Al-Sayaghi K, Tawalbeh LI, Suliman M, Al Bashtawy M, et al. Compliance of Nurses and Hospitals With Ventilator-Associated Pneumonia Prevention Guidelines: A Middle Eastern Survey. *Journal of Nursing Care Quality*. 2018;33(3):E8-E14.
53. Ilesanmi RE, Olabisi P. Assessment of Common Interventions and Perceived Barriers to Pressure Ulcer Prevention in Southwest Nigeria. *J Wound Ostomy Cont Nurs*. 2014;41(3):242-6.
54. Byrne-Davis L, Slattery H, Whiteside S, Moro E, Jackson M, Onyachi N, et al. Efficacy and acceptability of an acute illness management course delivered to staff and students in Uganda by staff from the UK. *Special Issue: Disease elimination*. 2015;7(5):360-6.
55. Marzuola JM. Teaching Strategies to Reduce VAP at Mulago Hospital: A Capstone Project. 2016.
56. Bongar MVV, Pangan FC, Macindo JRB. Characteristics of a critical care clinical placement programme affecting critical care nursing competency of baccalaureate nursing students: A structural equation modelling. *Journal of Clinical Nursing*. 2019;28(9-10):1760-70.
57. Macindo JRB, Danganan MPB, Soriano CAF, Kho NSR, Bongar MVV. A conjoint analysis of the acute and critical care experiential learning preferences of Baccalaureate student nurses. *Nurse Education in Practice*. 2019;36:125-31.
58. Gorman LL, McDowell JRS. Identifying the needs of critical and acute cardiac care nurses within the first two years of practice in Egypt using a nominal group technique. *Nurse Education in Practice*. 2018;28:127-34.
59. Losonczy LI, Barnes SL, Liu S, Williams SR, McCurdy MT, Lemos V, et al. Critical care capacity in Haiti: A nationwide cross-sectional survey. *PLoS One*. 2019;14(6):e0218141.
60. Macleod JBA, Jones T, Aphivantrakul P, Chupp M, Poenaru D. Evaluation of fundamental critical care course in Kenya: knowledge, attitude, and practice. *The Journal of surgical research*. 2011;167(2):223-30.
61. Gundo R. Development, Implementation and Evaluation of an In-service Training Programme for Critical Care Nurses in Malawi: Auckland University of Technology; 2019.
62. Spiwak R, Lett R, Rwanyuma L, Logsetty S. Creation of a standardized burn course for Low Income Countries: Meeting local needs. *Burns*. 2014;40(7):1292-9.
63. Byrne-Davis L, Slattery H, Whiteside S, Moro E, Jackson M, Onyachi N, et al. Efficacy and acceptability of an acute illness management course delivered to staff and students in Uganda by staff from the UK. *Int Health*. 2015;7(5):360-6.
